# Supplementary material for: SLIRP stabilizes LRPPRC via an RRM–PPR protein interface
Source: PubMed Central journal article supplement — Nucleic Acids Res. 2016 Jun 28;44(14):6868–82. doi: 10.1093/nar/gkw575 (PMC5001613; doi:10.1093/nar/gkw575), 2016-06-28
Supplement: supp_gkw575_nar-01396-v-2016-File009.pdf [file supp_gkw575_nar-01396-v-2016-File009.pdf]

## **SUPPLEMENTARY DATA**

### **SLIRP stabilizes LRPPRC via an RRM-PPR protein interface**

Spåhr, H. *et al.*

**Table S1**

|    | Gene                | mtDNA position | Number of reads | 3' to 5' CLIP read sequence                  |
|----|---------------------|----------------|-----------------|----------------------------------------------|
| 1  | H-strand            | 269-294        | >600            | ACACAGACATCATAACAAAAAATTT                    |
| 2  | 12S                 | 1561-1594      | 20              | CGTAACATGGTAAGTGTACTGGAAAGTGCCTTG            |
| 3  | 16S                 | 2218-2249      | 11              | CCACTACCTAAAAAATCCCAAACATATAACTG             |
| 4  | MTND1               | 4020-4048      | 12              | CACTACAATCTTCCTAGGAACAACATATG                |
| 5  | MTND2               | 5222-5262      | ~87             | AGGAGGCCTGCCCCCGCTAACCGGCTTTTTGCCCAAATGG     |
| 6  | MTCO1               | 5959-5988      | ~30             | ACCTATTATTTCGGCGCATGAGCTGGAGTCC              |
| 7  | MTCO1               | 6122-6152      | 40              | CATAATCGGAGGCTTTGGCAACTGACTAGTT              |
| 8  | MTCO1               | 6551-6582      | ~160            | CACCACCTTCTTCGACCCCGCCGGAGGAGGAG             |
| 9  | MTCO1               | 6848-6871      | 20              | CACCGGCGTCAAAGTATTTAGCTG                     |
| 10 | MTCO1               | 7026-7065      | >20             | GCCCACTTCCACTATGTCTATCAATAGGAGCTGTATTTG      |
| 11 | MTCO2               | 7873-7900      | >40             | CATCAAATCAATTGGCCACCAATGGTAC                 |
| 12 | MTCO2               | 7976-8005      | 15              | GGCGACCTGCGACTCCTTGACGTTGACAAT               |
| 13 | MTCO2               | 8135-8177      | >30             | TTCACCGCTACACGACCGGGGTATACTACGGTCAATGCTCTG   |
| 14 | MTATP8              | 8372-8394      | 29              | CAACTAAATACTACCGTATGGCC                      |
| 15 | MTATP8/6            | 8562-8592      | 152             | CACAATCCTAGGCCTACCCGCCGAGTACTG               |
| 16 | MTATP6              | 8657-8685      | ~680            | CCACCCAACAATGACTAATCAAACCTAAC                |
| 17 | MTATP6              | 8974-9002      | >600            | CTCATTCAACCAATAGCCCTGGCCGTACGC               |
| 18 | MTCO3               | 9279-9322      | ~30             | CTCCTAATGACCTCCGGCCTAGCCATGTGATTTCACTTCCACTC |
| 19 | MTCO3               | 9563-9597      | ~26             | AGGCATCACCCCGCTAAATCCCCTAGAAGTCCCAC          |
| 20 | MTCO3               | 9917-9948      | ~20             | CGCCGCCTGATACTGGCATTGTTGTAGATGTGG            |
| 21 | MTND3               | 10161-10186    | >60             | ACCCCTTACGAGTGCGGCTTCGACCC                   |
| 22 | MTND4L              | 10644-10675    | 16              | GTGCCTATTGCCATACTAGTCTTTGCCGCCTG             |
| 23 | MTND4               | 10993-11029    | ~35             | GGCAAGCCAACGCCACTTATCCAGTGAACCACTATCA        |
| 24 | MTND4               | 11872-11896    | >200            | CACTATTAACCTACTGGGAGAACTC                    |
| 25 | MTND5               | 13682-13712    | ~26             | CCCTACTAAACCCCATTAACGCCTGGCAGC               |
| 26 | MTCYB               | 14814-14842    | 37              | CCCCATCCAACATCTCCGCATGATGAAAC                |
| 27 | MTCYB               | 14956-14985    | 28              | TCGAGACGTAAATTATGGCTGAATCATCCG               |
| 28 | tRNA <sup>Pro</sup> | 15957-15991    | 22              | CAGAGAAAAAGTCTTTAACTCCACCATTAGCACCC          |

**Table S1.** Sequences of the RNA fragments identified after CLIP performed on HEK293-FlpIn TRex cells expressing FLAG-tagged SLIRP. Positions of the RNA fragments along mtDNA and numbers of reads are indicated.

**Table S2**

| <b>LRPPRC-SLIRP</b>                |                    |                      |                              |                              |                      |
|------------------------------------|--------------------|----------------------|------------------------------|------------------------------|----------------------|
|                                    | <b>Amount (ng)</b> | <b>Protein score</b> | <b>Molecular weight (Da)</b> | <b>Sequence coverage (%)</b> | <b>Amount (fmol)</b> |
| <b>Sample1</b>                     |                    |                      |                              |                              |                      |
| LRPPRC                             | 26.42              | 9705.80              | 153037.62                    | 94.16                        | 172.64               |
| SLIRP                              | 1.46               | 15022.65             | 10737.11                     | 89.13                        | 135.98               |
| Ratio                              |                    |                      |                              |                              | 1.27                 |
| <b>Sample2</b>                     |                    |                      |                              |                              |                      |
| LRPPRC                             | 27.32              | 8905.34              | 153037.62                    | 94.61                        | 178.52               |
| SLIRP                              | 1.52               | 14860.53             | 10737.11                     | 88.04                        | 141.57               |
| Ratio                              |                    |                      |                              |                              | 1.26                 |
| <b>Sample3</b>                     |                    |                      |                              |                              |                      |
| LRPPRC                             | 23.69              | 7920.79              | 153037.62                    | 94.68                        | 154.80               |
| SLIRP                              | 1.32               | 14470.08             | 10737.11                     | 89.13                        | 122.94               |
| Ratio                              |                    |                      |                              |                              | 1.26                 |
| Average ratio                      |                    |                      |                              |                              | <b>1.26</b>          |
| <b>LRPPRC-SLIRP-ATP6_8657-8685</b> |                    |                      |                              |                              |                      |
| <b>Sample1</b>                     |                    |                      |                              |                              |                      |
| LRPPRC                             | 35.91              | 10720.66             | 153037.62                    | 94.53                        | 234.65               |
| SLIRP                              | 1.82               | 14747.49             | 10737.11                     | 79.35                        | 169.51               |
| Ratio                              |                    |                      |                              |                              | 1.38                 |
| <b>Sample2</b>                     |                    |                      |                              |                              |                      |
| LRPPRC                             | 34.47              | 9993.46              | 153037.62                    | 92.58                        | 225.24               |
| SLIRP                              | 1.80               | 14239.73             | 10737.11                     | 90.22                        | 167.64               |
| Ratio                              |                    |                      |                              |                              | 1.34                 |
| <b>Sample3</b>                     |                    |                      |                              |                              |                      |
| LRPPRC                             | 32.96              | 9619.88              | 153037.62                    | 93.18                        | 215.37               |
| SLIRP                              | 1.80               | 15464.74             | 10737.11                     | 90.22                        | 167.64               |
| Ratio                              |                    |                      |                              |                              | 1.28                 |
| Average ratio                      |                    |                      |                              |                              | <b>1.33</b>          |

**Table S2.** Stoichiometry analysis of LRPPRC-SLIRP with and without RNA. The amounts were determined by absolute quantification MS in triplicates.

## Figure S1

| Protein     | PPR sequence                         | TPRpred<br>P-value |
|-------------|--------------------------------------|--------------------|
| LRPPRC 128  | RSCGSLLPPELKLEERTEFAHRIWDTLQKLGAVYDV | 162 1.9e-05        |
| LRPPRC 163  | SHYNALLKVYLQNEYKFSPTDFLAKMEEANIQPNR  | 197 1.6e-07        |
| LRPPRC 198  | VTYQRLIASYCNVGDIEGASKILGFMKTKDLPVTE  | 232 8.2e-11        |
| LRPPRC 233  | AVFSALVTGHARAGDMENAENILTVMRDAGIEPGP  | 267 7.9e-12        |
| LRPPRC 268  | DTYLALLNAYAEEKGDIDHVKQTLEKVEKSELHLM  | 302 2.6e-09        |
| LRPPRC 303  | RDLLQIIFSFSKAGYPQYVSEILEKVT CERRYIPD | 337 9.4e-04        |
| LRPPRC 405  | FPLQFTLHCALLANKTDLAKALMKAVKEEGFPIRP  | 439 4.1e-04        |
| LRPPRC 440  | HYFWPLLVGRRKEKNVQGIIEILKGMQELGVHPDQ  | 474 4.2e-06        |
| LRPPRC 712  | GGYAALINLCCRHDKVEDALNLKEEFDRDLSSAVL  | 746 3.1e-07        |
| LRPPRC 749  | GKYVGLVRVLAKHGKLDQAINILKEMKEKDVLIKD  | 783 2.0e-09        |
| LRPPRC 787  | LSFFHMLNGAALRGEIETVKQLHEAIVTLGLAEPS  | 821 1.1e-06        |
| LRPPRC 823  | NISFPLVTVHLEKGDLDSTALEVAIDCYEKYKVLPR | 857 8.3e-03        |
| LRPPRC 956  | QMYYNLLKLYKINGDWQRADAVWNKIQEENVIPRE  | 990 1.2e-07        |
| LRPPRC 993  | LRLLAEILREGNQEVFPDVPPELWYEDEKHSLSNSS | 1027 3.9e-01       |
| LRPPRC 1033 | PDFQKDILIAACRLNQKKGAYDIFLNAKEQNIVFNA | 1067 8.3e-04       |
| LRPPRC 1068 | ETYSNLIKLLMSSEDYFTQAMEVKAFETHIKGFTL  | 1102 7.7e-04       |
| LRPPRC 1105 | AANSRLIITQVRRDYLKEAVTTLKTVLDQQQTPSR  | 1139 1.8e-03       |
| LRPPRC 1140 | LAVTRVIQALAMKGDVENIEVVQKMLNGLED SIGL | 1174 5.6e-03       |
| LRPPRC 1178 | VFINNIALAQIKNNNIDAAIENIENMLTSENKVIE  | 1212 4.3e-04       |
| LRPPRC 1215 | YFGLAYLFRKVIEEQLEPAVEKISIMAERLANQFA  | 1249 5.2e-01       |
| LRPPRC 1252 | KPVTDFFLQLVDAGKVDDARALLQRCGAIAEQTPI  | 1286 3.0e-03       |
| LRPPRC 1319 | EAYNSLMKSYVSEKDVTSAKALYEHLTAKNTKLDD  | 1353 9.6e-07       |

**Figure S1.** Predicted PPRs in LRPPRC using TPRpred. PPR sequences flanked by amino acid numbers are indicated.

**Figure S2**

| Feature | Sequence                                                             | Predicted recognition code |
|---------|----------------------------------------------------------------------|----------------------------|
| MTS     | 1 MAALLRSARWLLRAGAAPRLPLSLRLLPGGPGRLHAASYLPAARAGPVAGGLLSPARLYA       |                            |
| Flank   | 61 IAAKEKDIQEESTFSSRKISNQFDWALMRLDLSVRRTGRIPKLLQKVFNDTCRSGGLGGSHALLL |                            |
| PPR1    | 128 RSCGSLLELPELKLLEERTEFAHRIWDTLQKLGAVYDV                           | G                          |
| PPR2    | 163 SHYNALLKVYLQNEYKFSPTDFLAKMEEANIQPNR                              | C                          |
| PPR3    | 198 VTYQRLIASYCNVGDIEGASKILGFMKTKDLPVTE                              | c/u                        |
| PPR4    | 233 AVFSALVTGHARAGDMENAENILTVMRDAGIEPGP                              | a/u                        |
| PPR5    | 268 DTYLALLNAYAEEKGDIDHVQKQTELEKVEKSELHLM                            | c/u                        |
| PPR6    | 303 RDLLQIIFFSKAGYPQYVSEILEKVTTCERRYIPDA                             | g                          |
| PPR7    | 339 MNLILLLVTEKLEDVALQILLACPVSKEDGPSV                                | c                          |
| PPR8    | 372 FGSEFLLQHCVTMNTPEKLTDYCKKLKEVQMS                                 | a                          |
| PPR9    | 405 FPLQFTLHCALLANKTDLAKALMKAVKEEGFPIRP                              | c                          |
| PPR10   | 440 HYFWPLLVGRRKEKNVQGIIEILKGMQELGVHPDQ                              | c/u/g/?                    |
| PPR11   | 475 ETYTDYVIPCFDSVNSARAILQENGCLSDSDM                                 | G                          |
| PPR12   | 507 FSQAGLRSEAANGNLDVLSFLKSNTLPIS                                    | ?                          |
| PPR13   | 537 LQSIRSSLLLGFRSMNINLWSEITELLYKDGRYCQEPGPTTE                       | ?                          |
| PPR14   | 580 AVGYFLYNLIDMSDSEVQAKEEHLRQYFHQLEKMNVKIPEN                        | ?                          |
| PPR15   | 622 NIYRGIRNLLSESYHVEPELIKDAHLLVESKNLDFQKTVQLTSSELESTLETLKAENQPIR    | ?                          |
| PPR16   | 679 DVLKQILILVLCSEENMQKALELKAKYESDMVT                                | ?                          |
| PPR17   | 712 GGYAALINLCCRHDKVEDALNLKEEFDRDLSSAVLDT                            | g/u                        |
| PPR18   | 749 GKYVGLVRVLAKHGKQLQDAINILKEMKEKDVLIKDTTA                          | ?                          |
| PPR19   | 787 LSFHMLNGAALRGEIETVKQLHEAIVTLGLAEPST                              | a/c                        |
| PPR20   | 823 NISEPLVTVHLEKGDLSALEVAIDCYEKYKVLPR                               | c/g                        |
| PPR21   | 859 HDVLCKLVEKGETDLIQKAMDFVSQEQGEMVMLYDLFFAFLQTNKYKEAKKIETPGI        | ?                          |
| PPR22   | 917 RARSARLQWFCDRCVANNQVETLEKLVLTQKLFECDRD                           | G                          |
| PPR23   | 956 QMYYNLLKLYKINGDWQRADAVWNKIQEENVIPRE                              | c/g                        |
| PPR24   | 991 KTLRLLAEILREGNQEVFPDVPPELWYEDEKHSLSNSSASTTE                      | g/u                        |
| PPR25   | 1033 PDFQKDILIAICRLNQKKGAYDIFLNAKEQNIIVFNA                           | c                          |
| PPR26   | 1068 ETYSNLIKLLMSDYFTQAMEVKAFETHIKGFTLND                             | A                          |
| PPR27   | 1105 AANSRLIITQVRRDYLKEAVTTLKTVLDQOQTPSR                             | A                          |
| PPR28   | 1140 LAVTRVIOALAMKGDVENIEVVQKMLNGLEDSIGLSKM                          | a/g                        |
| PPR29   | 1178 VFINNIALAQIKNNNIDAAIENIENMLTSENKVIPOY                           | C/u                        |
| PPR30   | 1216 FGLAYLFRKVIEEQLEPAVEKISIMAERLANQFATY                            | a/c                        |
| PPR31   | 1252 KPVTDFFLQLVDAGKVDDARALLQRCGAIAEQTP                              | G                          |
| PPR32   | 1286 ILLLFLLRNSRKQKASTVKSVLELIPELNEKE                                | ?                          |
| PPR33   | 1319 EAYNSLMKSYVSEKDVTSKALYEHLEHTAKNTKLLD                            | U/c                        |
| Flank   | 1353 LFLKRYASLLKYAGEPVPFIEPPESFEFYAQLRKLRENS                         |                            |

**Figure S2.** *In silico* analysis of the PPR motifs of LRPPRC. Key:

X = PPR identified by TPRpred

X = highly degenerate PPR/pair of PPRs, hard to infer function/structure

X = possible RNA specificity determining residue

UPPER CASE = good prediction

lower case = speculative prediction

? = can't predict

**Figure S3**

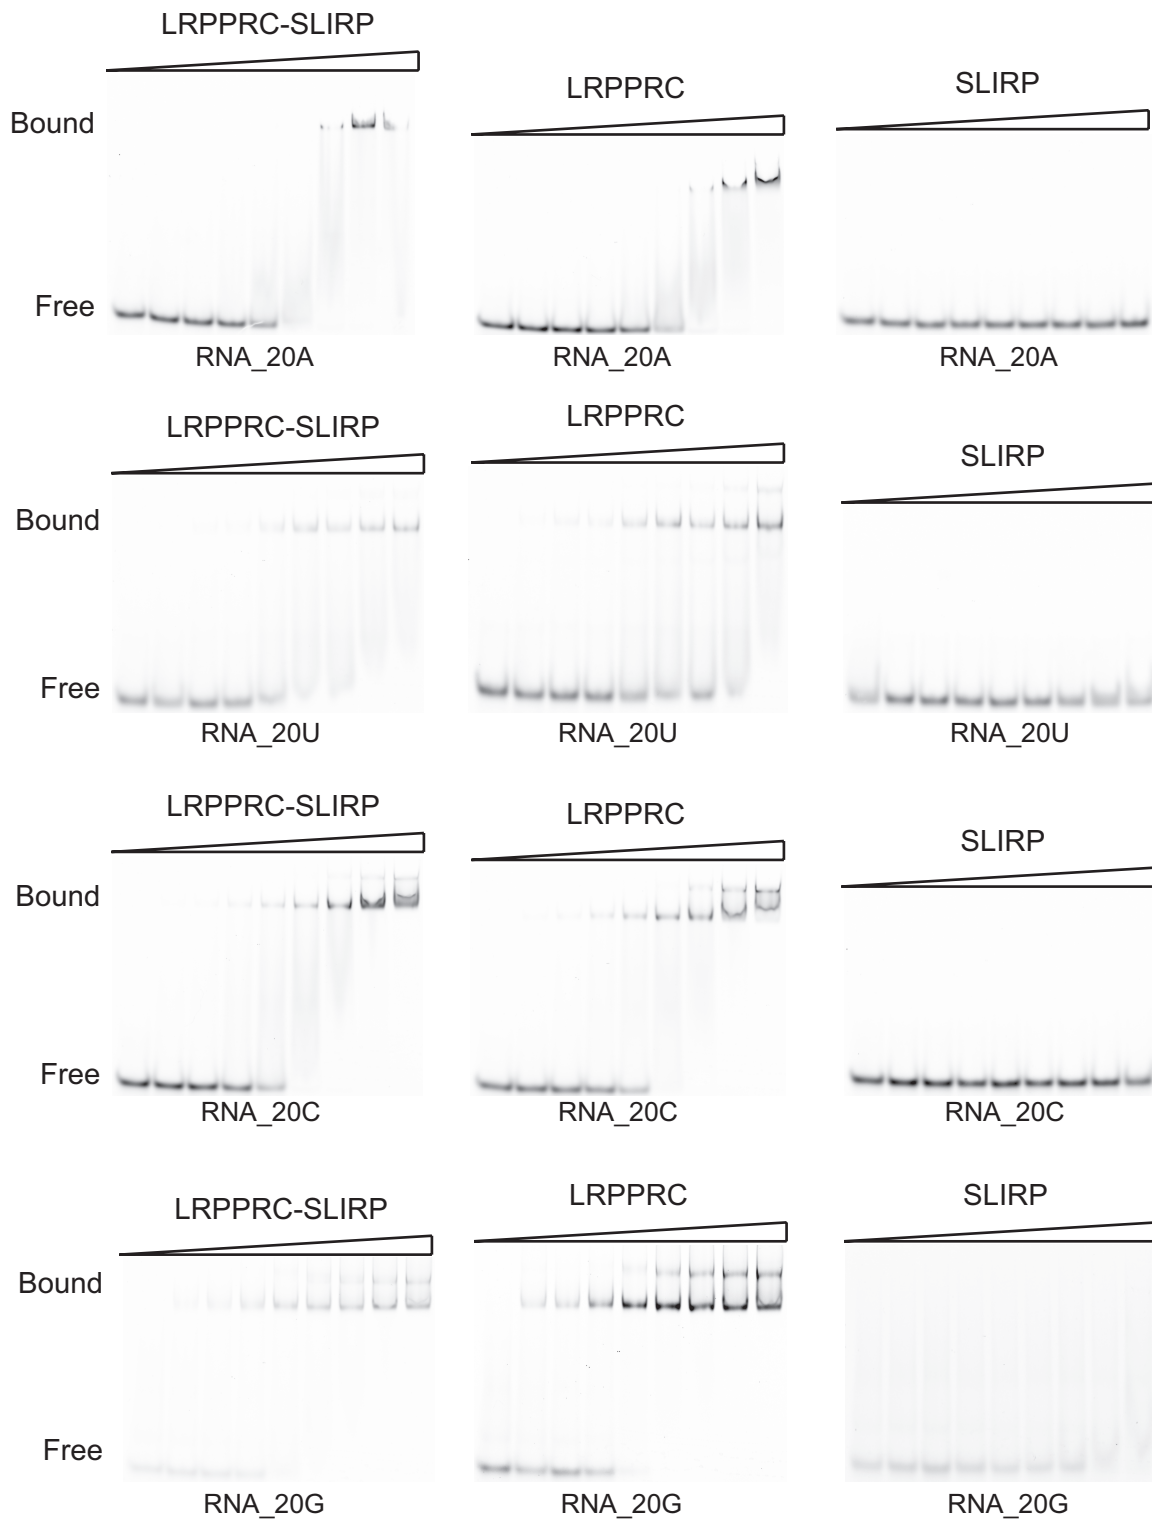

**Figure S3.** LRPPRC-SLIRP and LRPPRC have strong non-specific RNA binding capacity. RNA EMSA of LRPPRC-SLIRP, LRPPRC or SLIRP. RNA templates used are indicated. Protein concentrations used were 0, 0.02, 0.04, 0.08, 0.16, 0.36, 0.64, 1.28, 2.56  $\mu\text{M}$ , respectively.

**Figure S4**

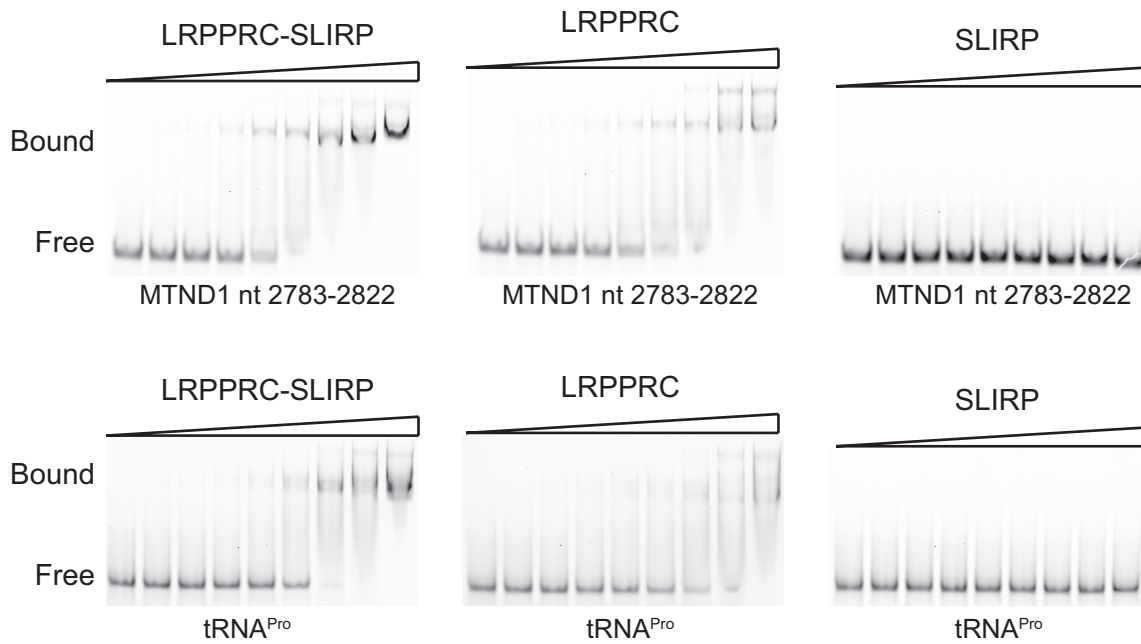

**Figure S4.** LRPPRC-SLIRP or LRPPRC bind both mRNA and tRNA. RNA EMSA of LRPPRC-SLIRP, LRPPRC or SLIRP. RNA templates used are indicated. Protein concentrations used were 0, 0.02, 0.04, 0.08, 0.16, 0.36, 0.64, 1.28, 2.56  $\mu\text{M}$ , respectively.

**Figure S5**

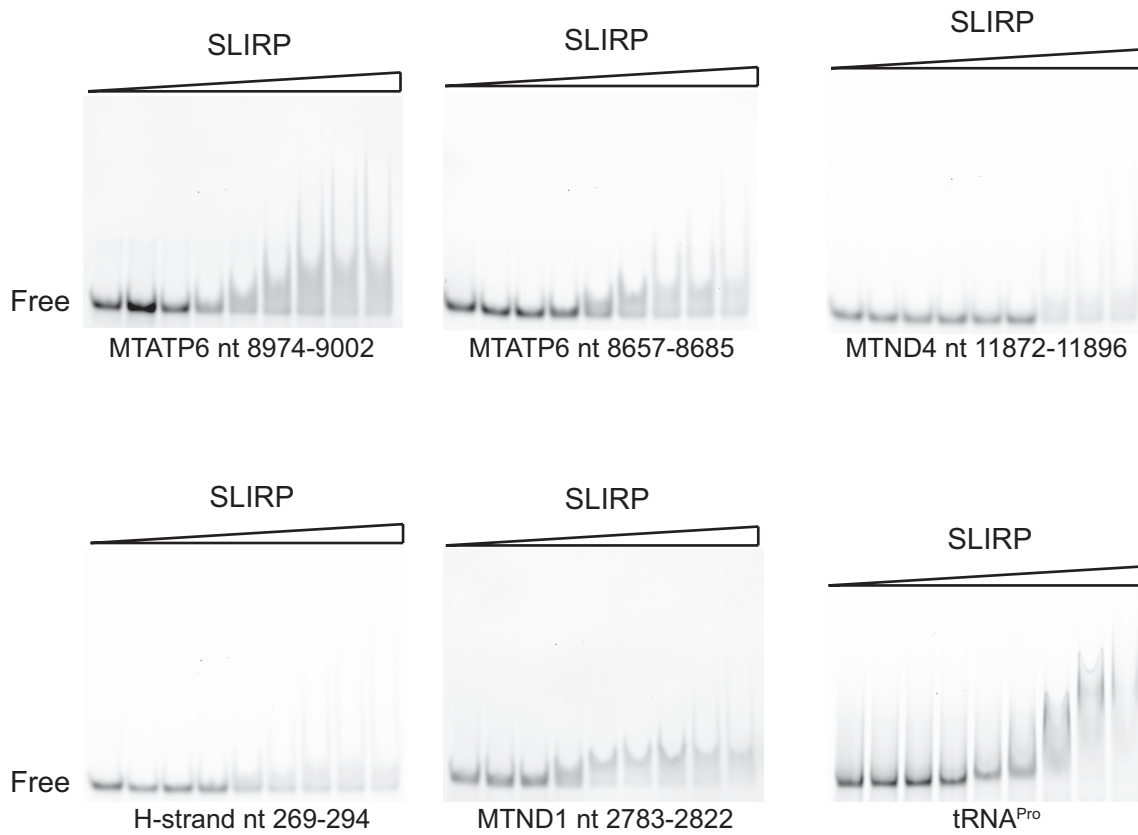

**Figure S5.** SLIRP binds RNA with low affinity. RNA EMSA of SLIRP with RNA templates used indicated. Protein concentrations used were 0, 0.2, 0.4, 0.8, 1.6, 3.6, 6.4, 12.8, 25.6  $\mu\text{M}$ , respectively.
